# Supplementary material for: TMEM33 as a Prognostic Biomarker of Cervical Cancer and Its Correlation with Immune Infiltration
Source: Hindawi journal article supplement (doi:10.1155/2023/5542181), 2023-05-27

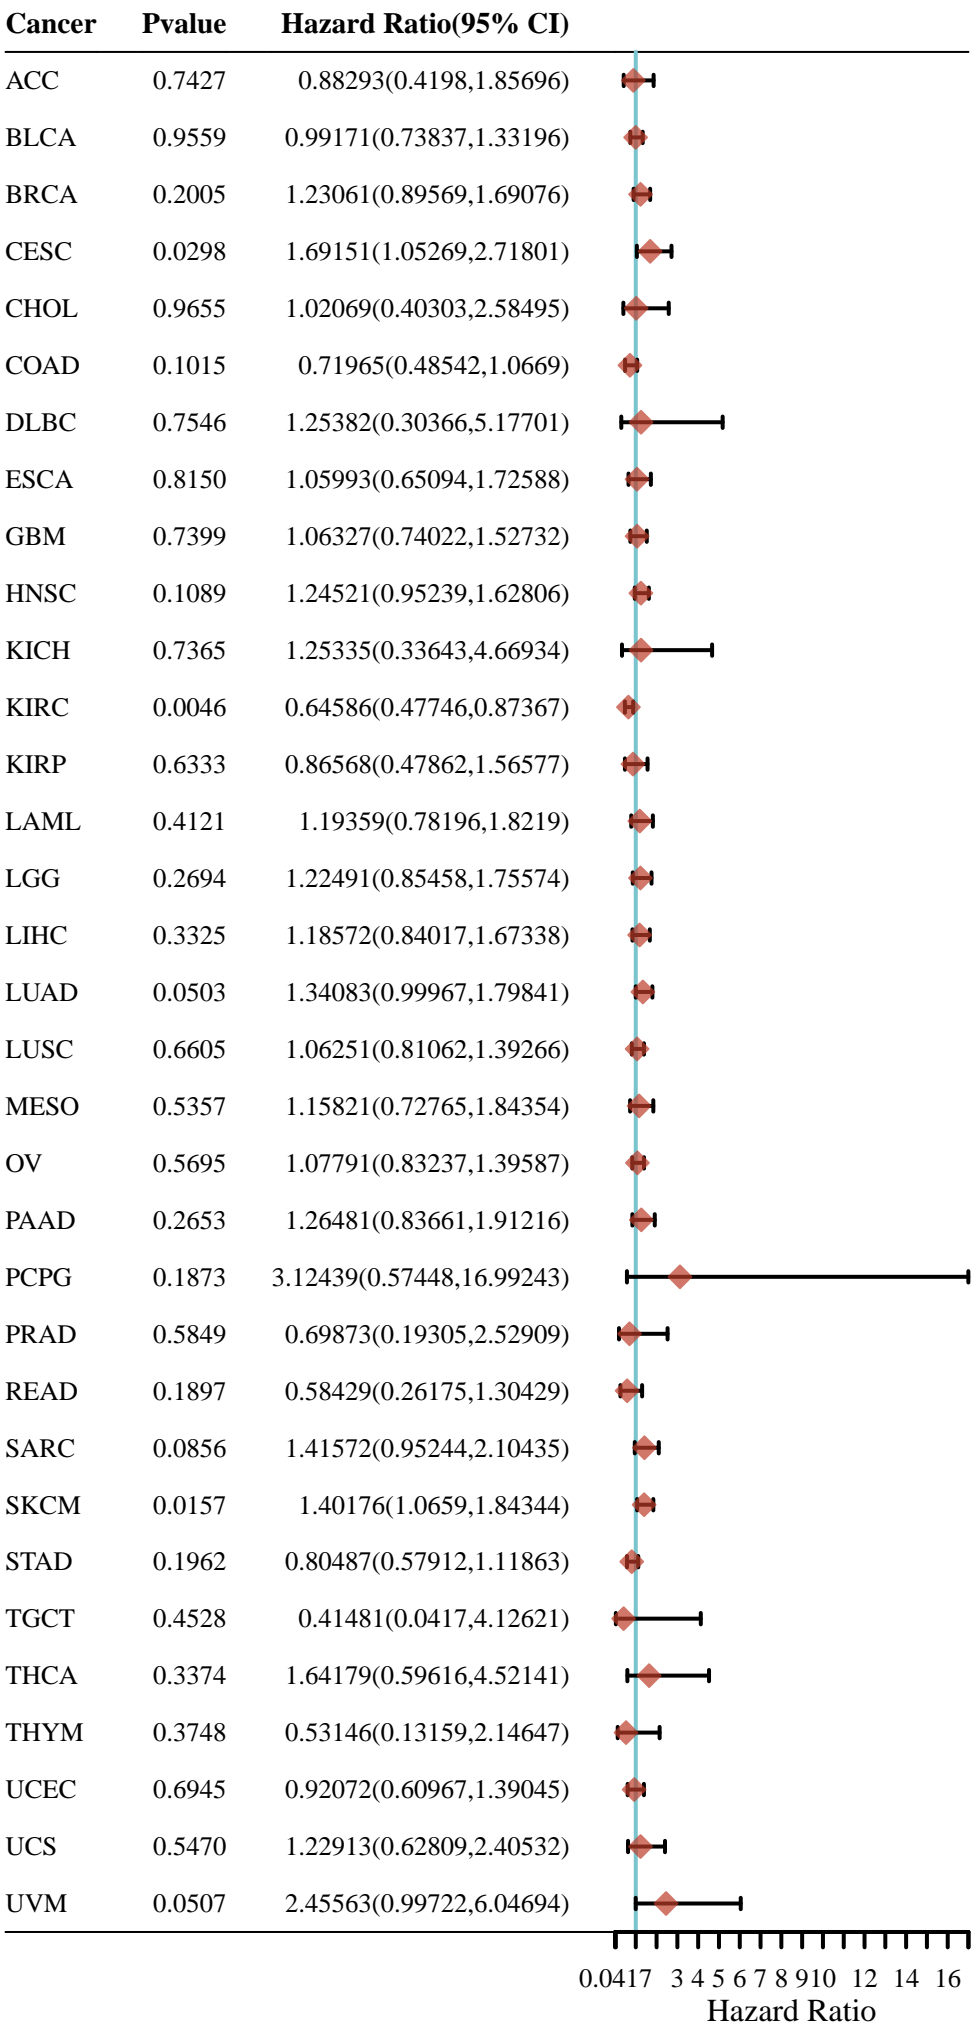

Supplement: f11 [file 5542181.f11.pdf]
